# Supplementary material for: Rational design of a thermalresponsive-polymer-switchable FRET system for enhancing the temperature sensitivity of upconversion nanophosphors
Source: Royal Society of Chemistry journal article supplement (doi:10.1039/c4nr02497d), 2014-01-01
Supplement: c4nr02497d1.pdf [file c4nr02497d1.pdf]

## **Electronic Supplementary Information for**

**Rational design of a thermalresponsive-polymer-switchable FRET system for  
enhancing the temperature sensitivity of upconversion nanophosphors†**

Qingbo Xiao,<sup>a</sup> Yanfang Li,<sup>a</sup> jin Li,<sup>a</sup> Mengxin Zhang,<sup>b</sup> Zhijun Zhang,<sup>b</sup> and Hongzhen  
Lin,<sup>\*a</sup>

<sup>a</sup> International Laboratory for Adaptive Bio-nanotechnology, Suzhou Institute of  
Nano-tech and Nano-bionics (SINANO), Chinese Academy of Science, Suzhou,  
215123, China. E-mail: hzlin2010@sinano.ac.cn

<sup>b</sup> Suzhou Key Laboratory of Nanobiomedicine, Division of Nanobiomedicine, Suzhou  
Institute of Nano-tech and Nano-bionics, Chinese Academy of Sciences, Suzhou  
215123, China.

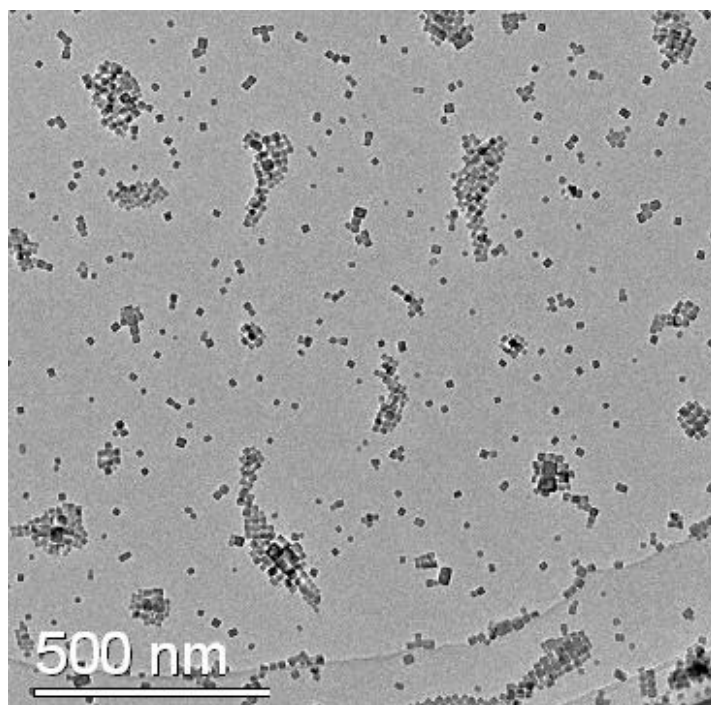

**Fig. S1.** TEM image of  $\text{NaYF}_4:\text{Mn}^{2+},\text{Ln}^{3+}$  UCNPs.

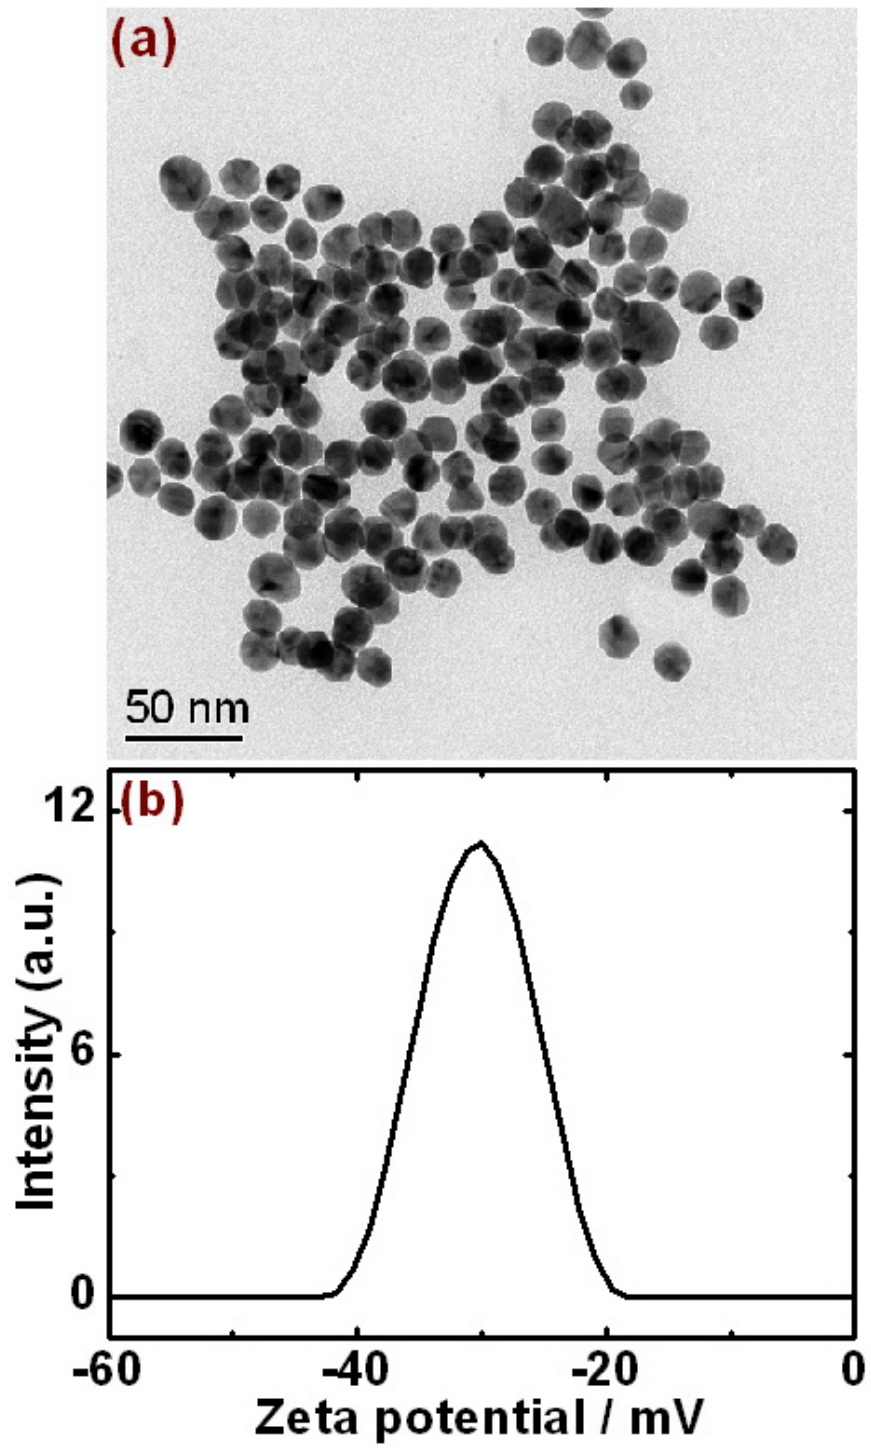

Fig. S2. (a) TEM and (b) Zeta potential of citrate stabilized Au NPs.

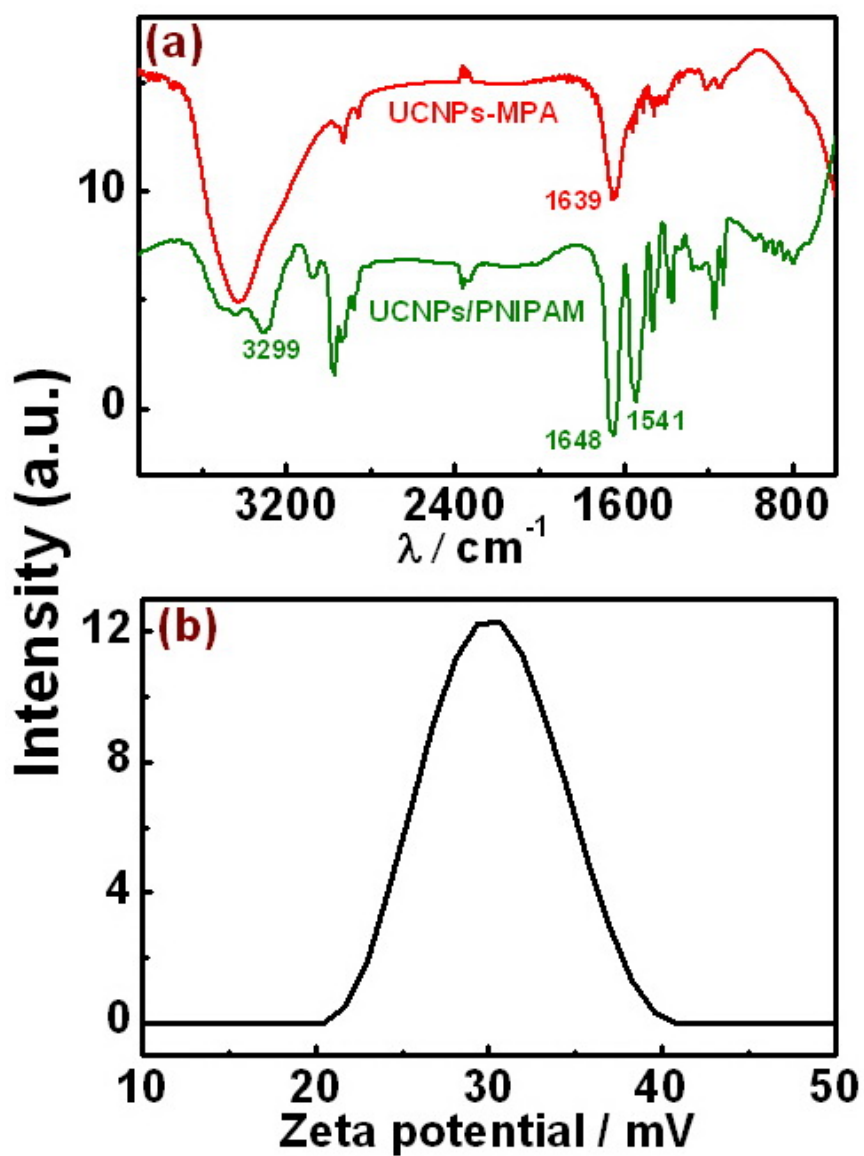

**Fig. S3.** (a) FTIR spectrum and (b) Zeta potential of the PNIPAM-conjugated UCNPs.

Also shown in (a) is the FTIR spectrum of MPA modified UCNPs.

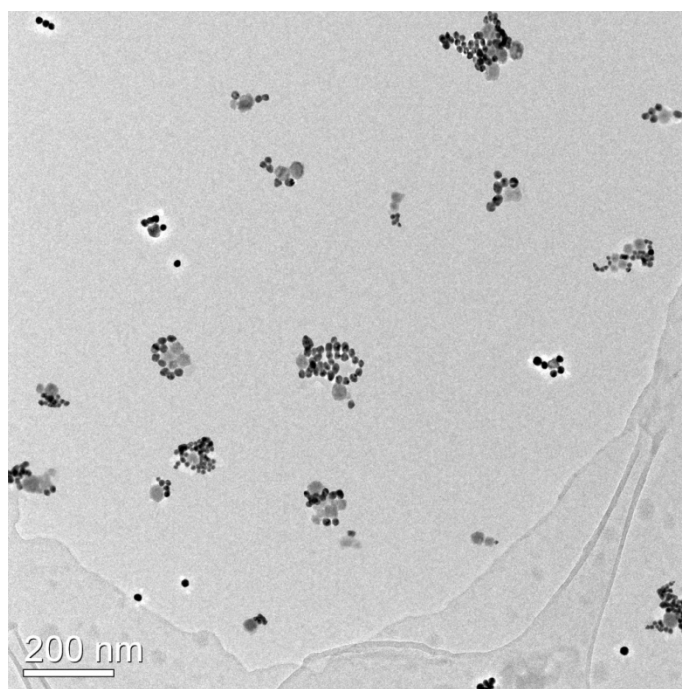

**Fig. S4.** TEM image of the upconverting nanocomposites.

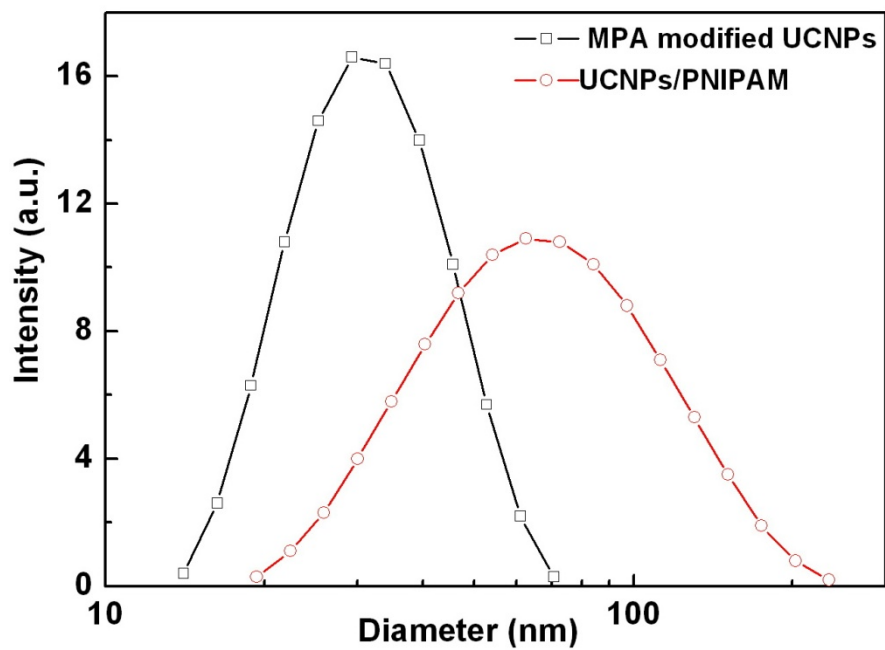

**Fig. S5.** Size distributions of MPA modified UCNPs and PNIPAM-conjugated UCNPs determined by DLS.

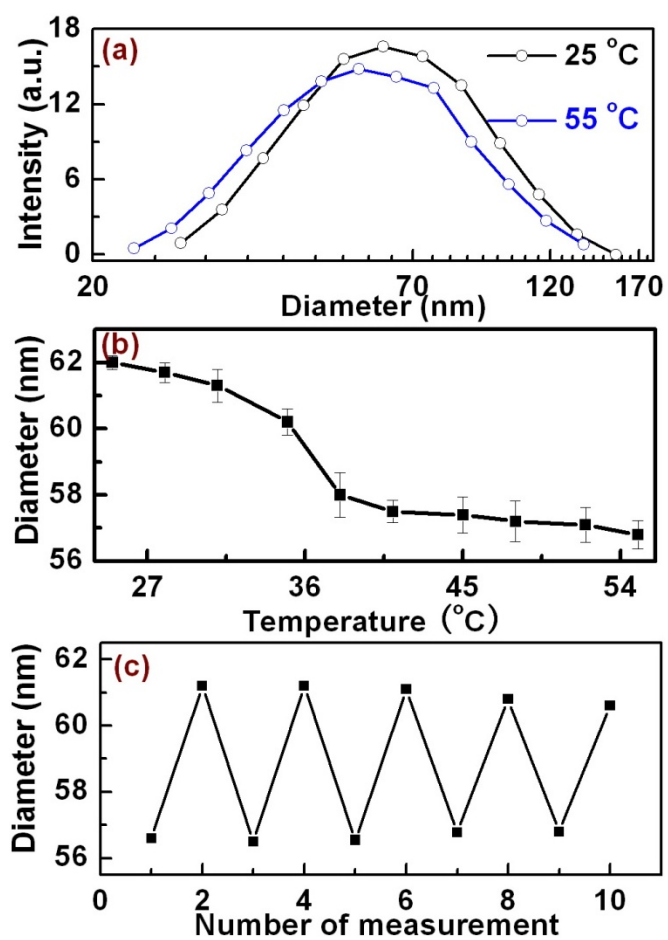

Fig. S6. (a) Size distributions, (b) hydrodynamic diameters and (c) multiple-run reversibility experiments of the upconverting nanocomposites to temperature variation determined by DLS.

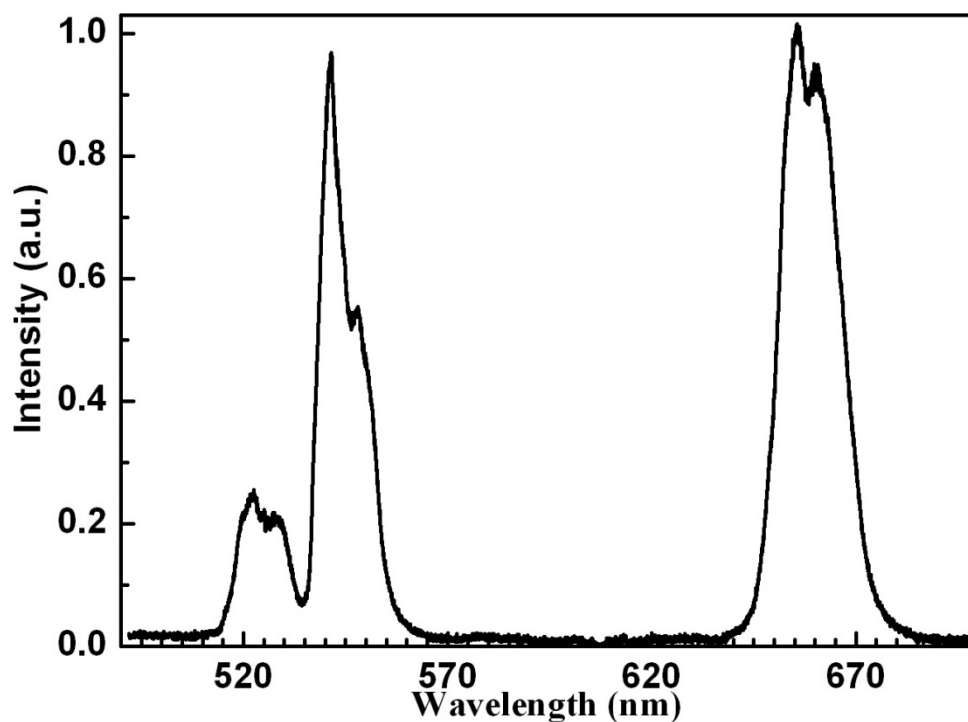

Fig. S7. UCL spectrum of NaLuF<sub>4</sub>: Er<sup>3+</sup>, Yb<sup>3+</sup> UCNP without Mn<sup>2+</sup> doping.

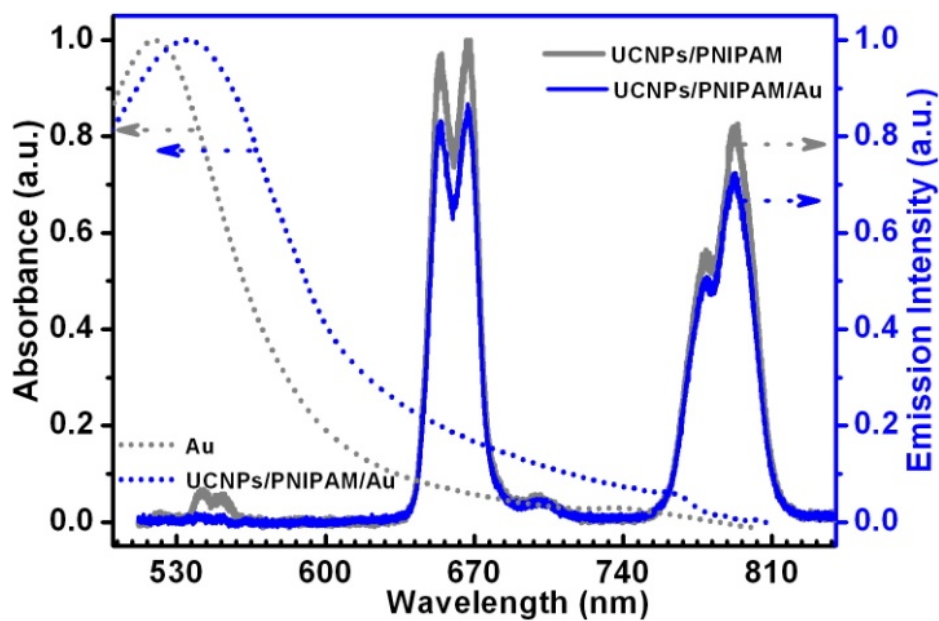

Fig. S8. Absorption spectra of Au NPs and the upconverting nanocomposites, and UCL spectra of PNIPAM-conjugated UCNP and the upconverting nanocomposites.



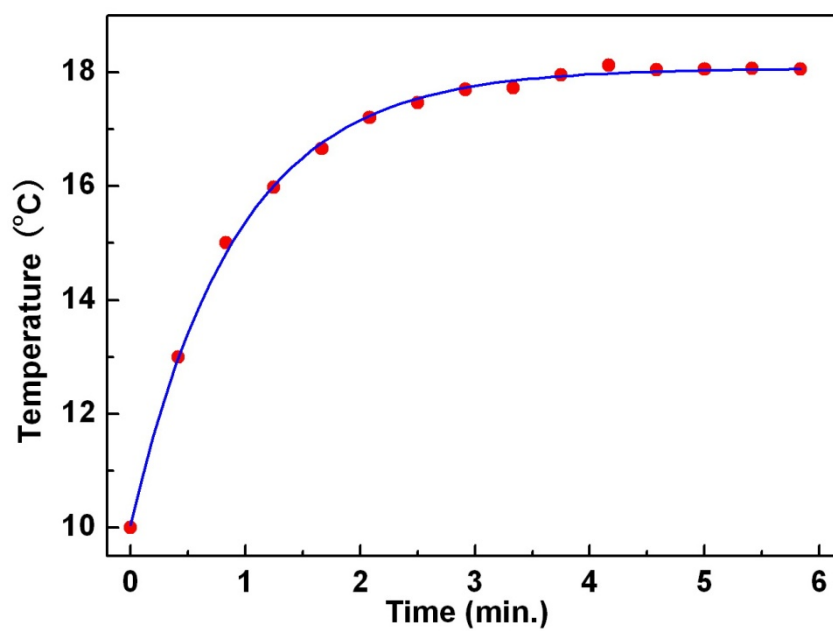

**Fig. S9.** Temporal profiles of temperature increase of the upconverting nanocomposites colloidal solution (2 mL) upon excitation at 980 nm.

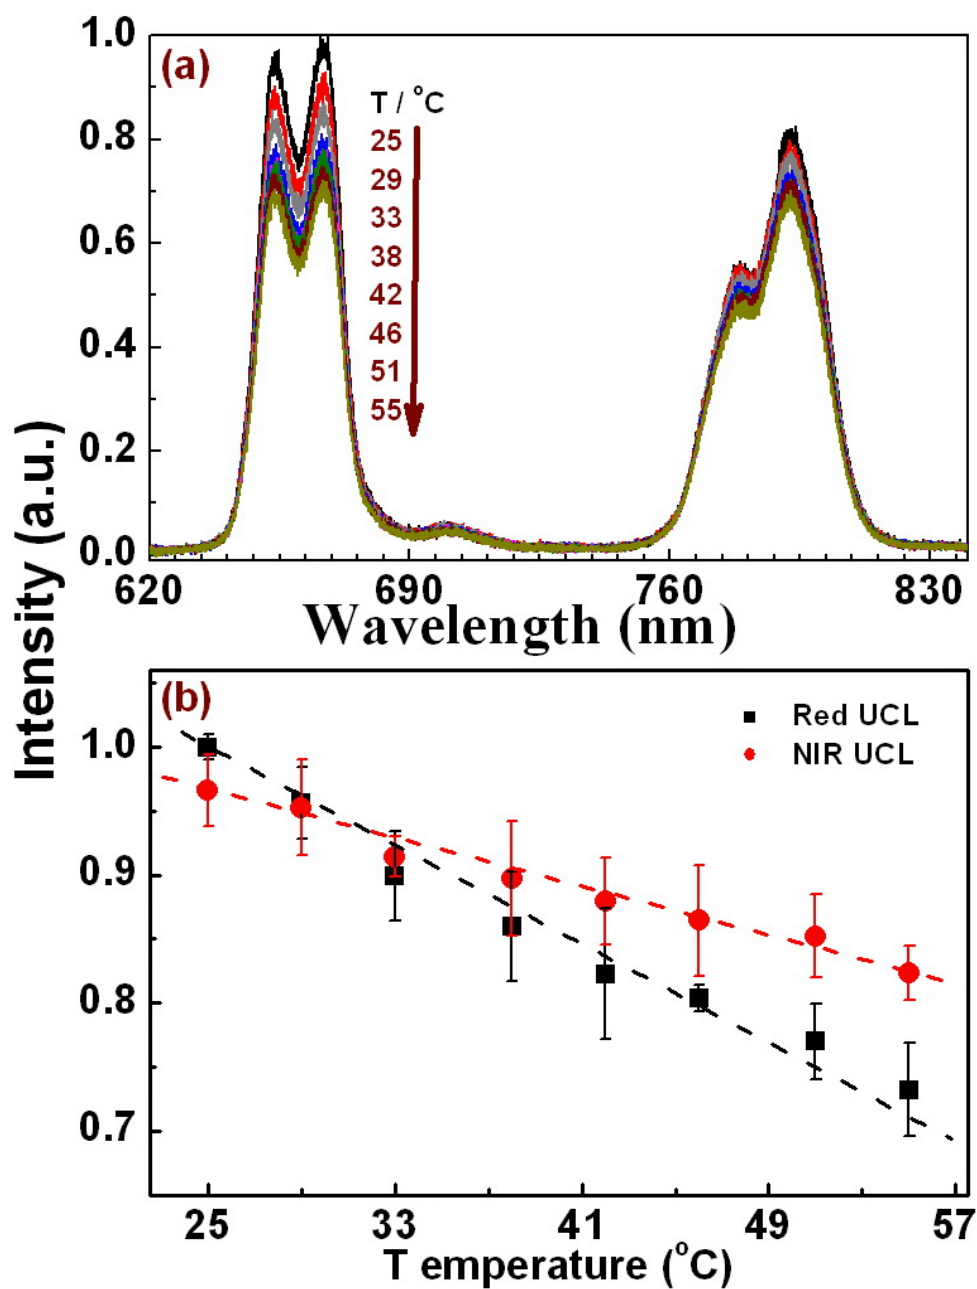

**Fig. S10.** Optical response of the PNIPAM-conjugated UCNPs to temperature variation: (a) UCL spectra at various temperature and (b) integrated intensity plots with the respective linear fits for the red and NIR emission bands centered at 660 and 800 nm, respectively.

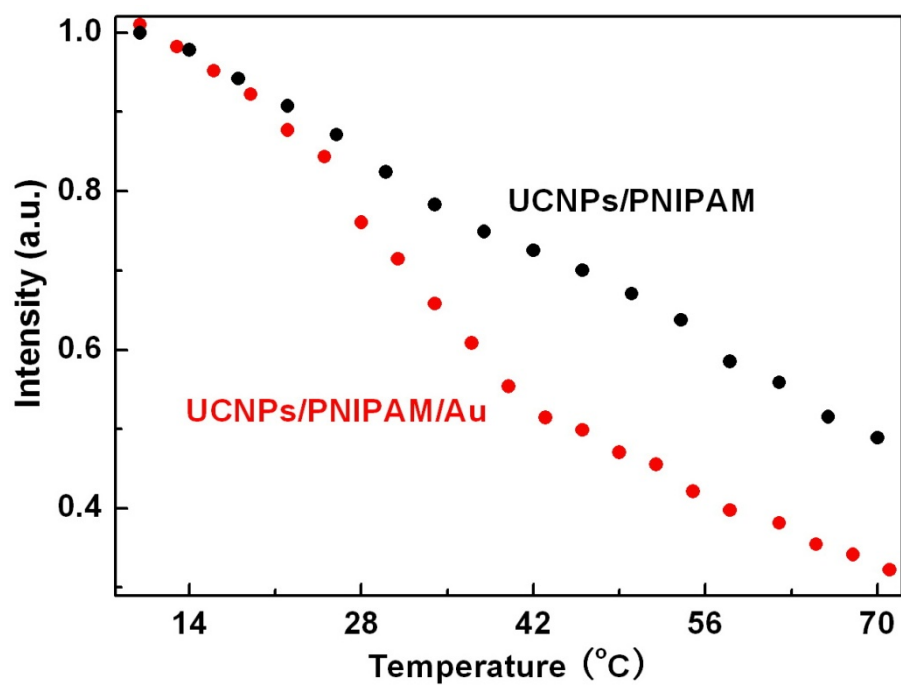

**Fig. S11.** Comparison of integrated intensity of the red emission bands for the upconverting nanocomposites with PNIPAM-conjugated UCNP in the temperature range of 10-70 °C.
